# Supplementary material
Source: publisher figshare collection journal article supplement (https://frontiersin.figshare.com/ndownloader/files/30660875)

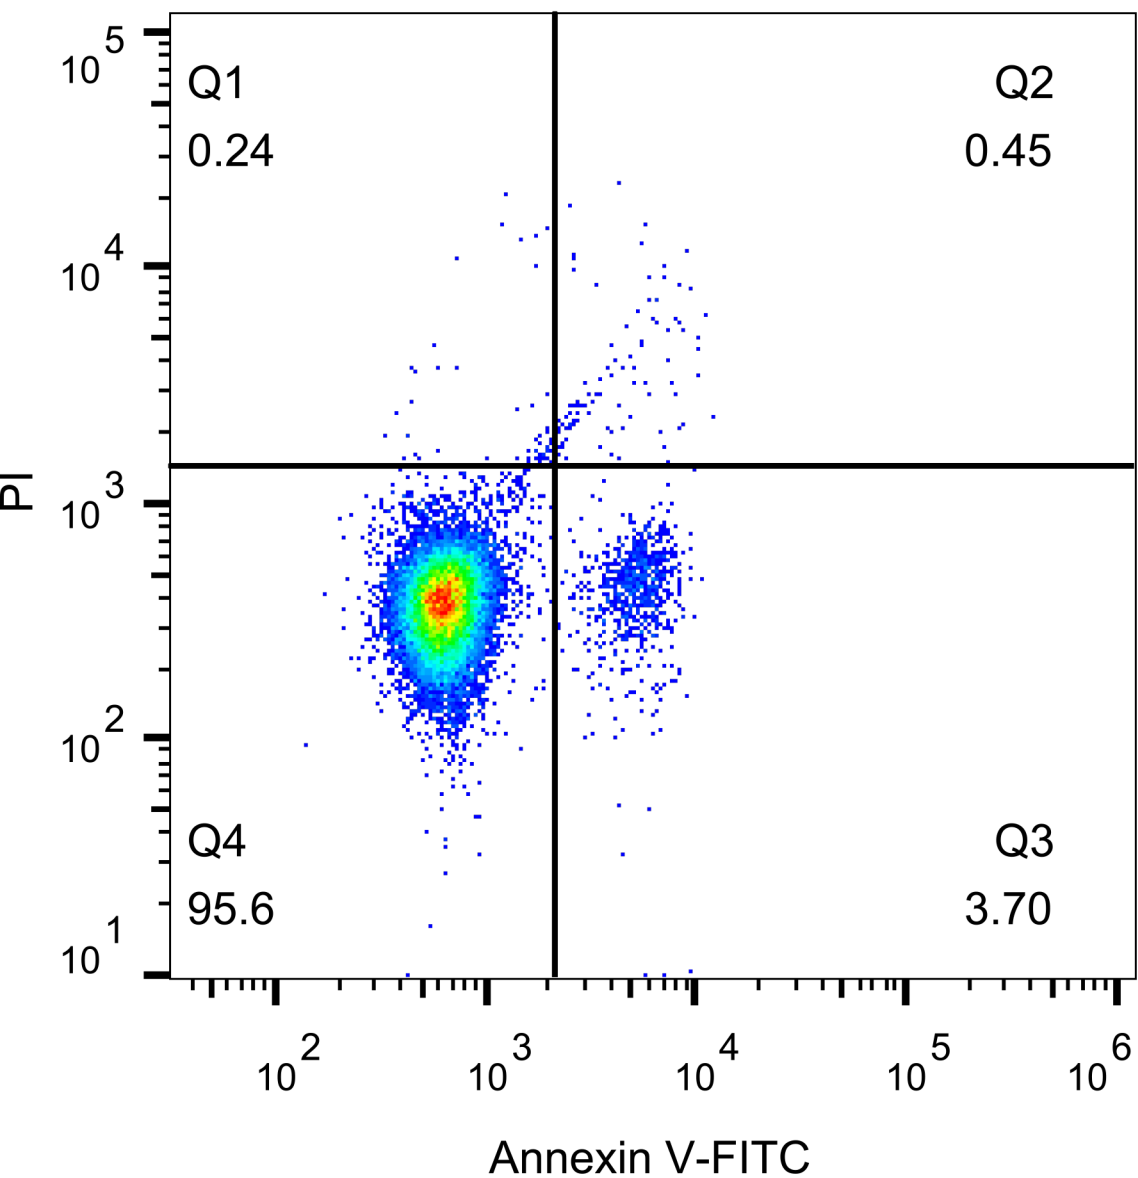

3-1.fcs

Single Cells

20671

Supplement: Supplementary file 1 [file 30660875]

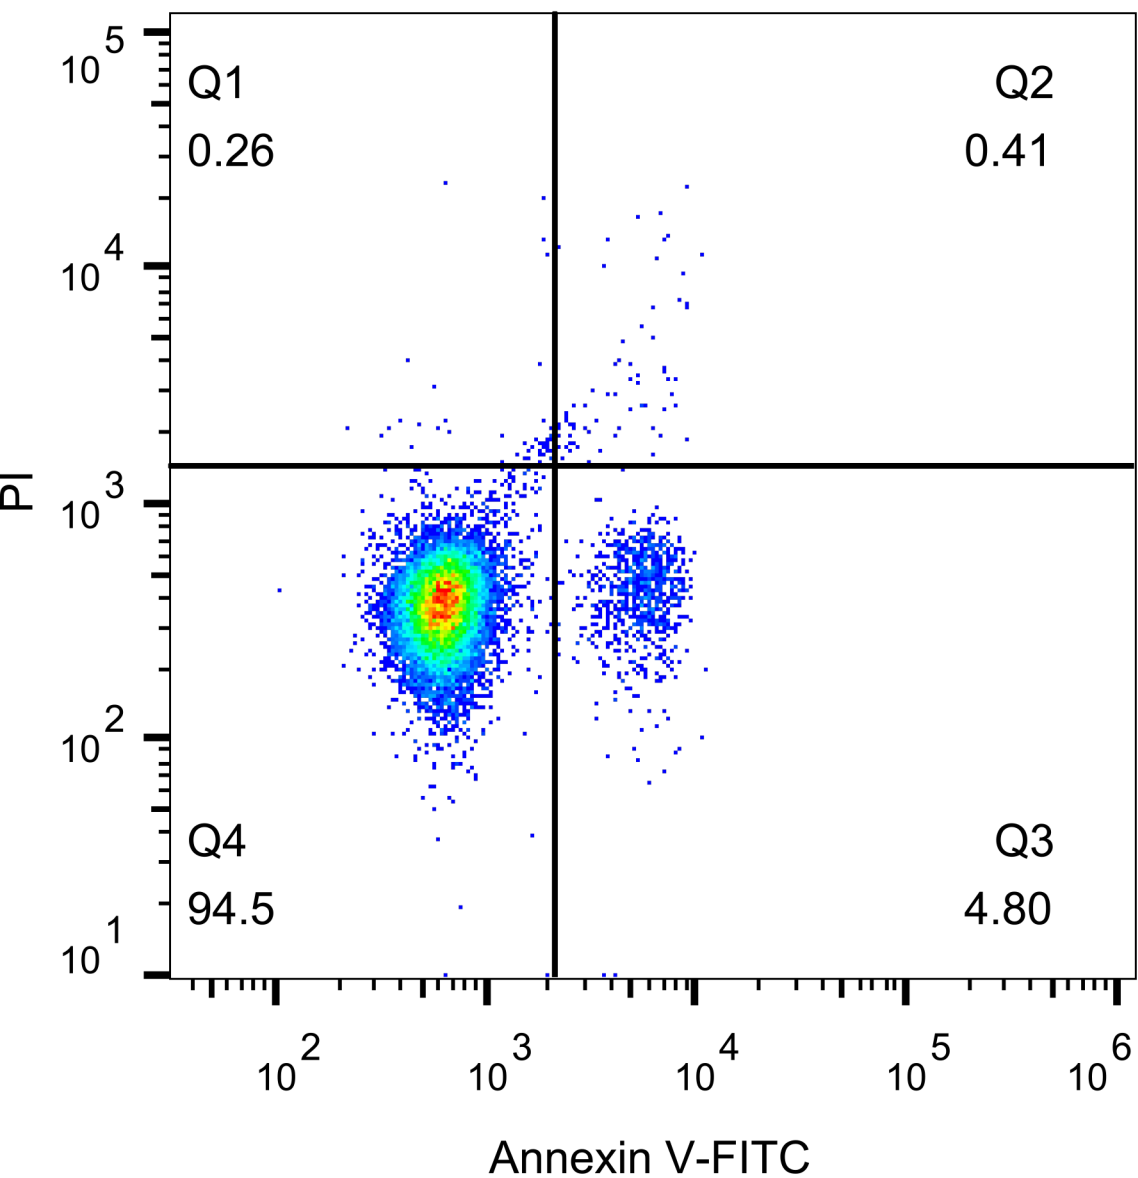

4-1.fcs

Single Cells

17173

Supplement: Supplementary file 2 [file 30660875]

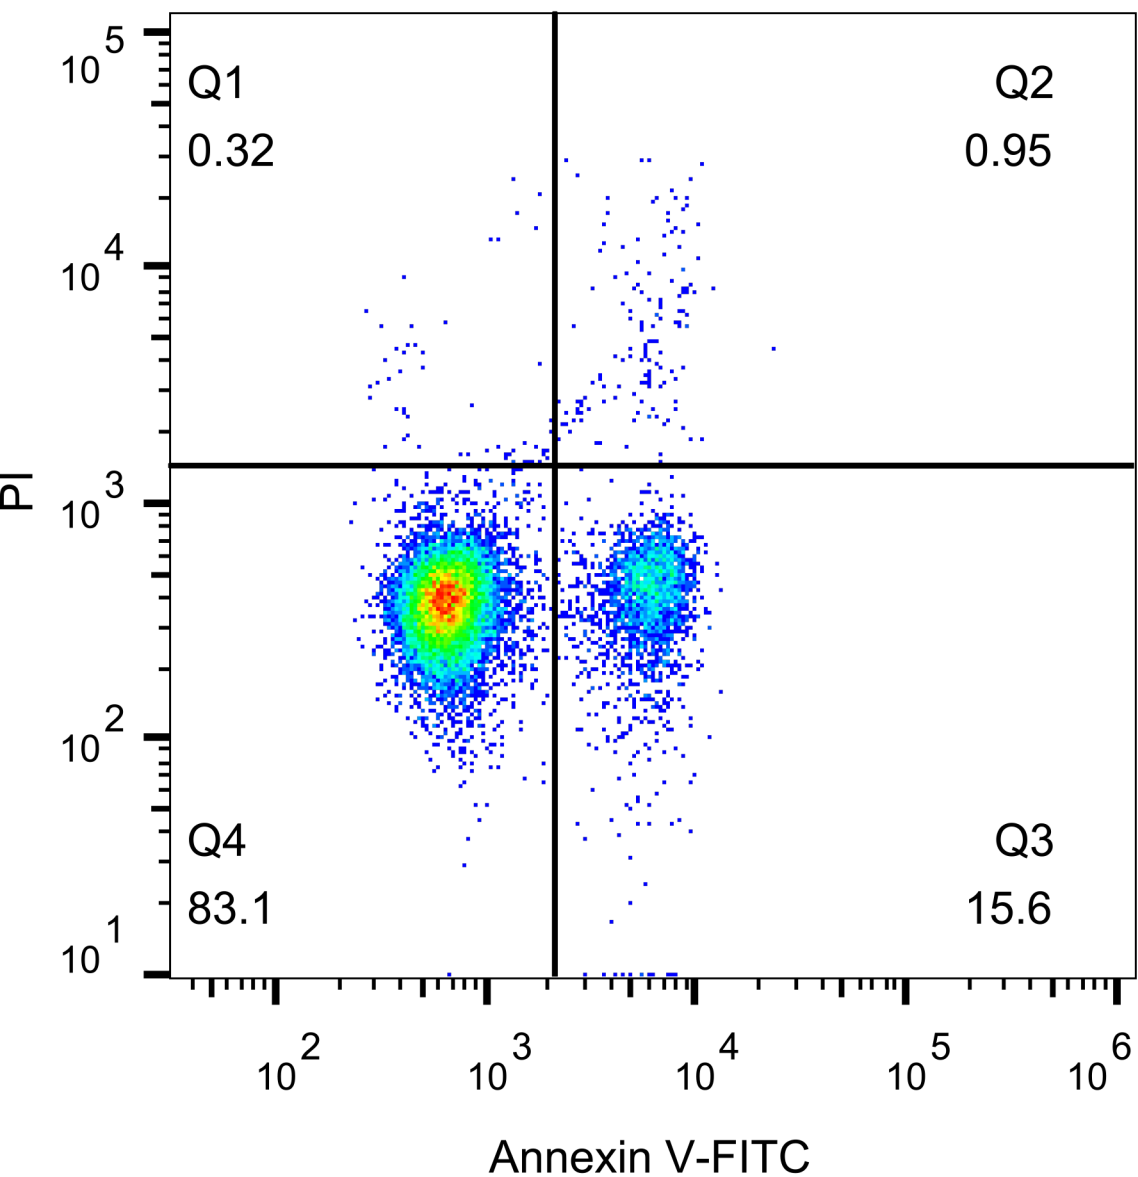

15-1.fcs

Single Cells

15629

Supplement: Supplementary file 3 [file 30660875]

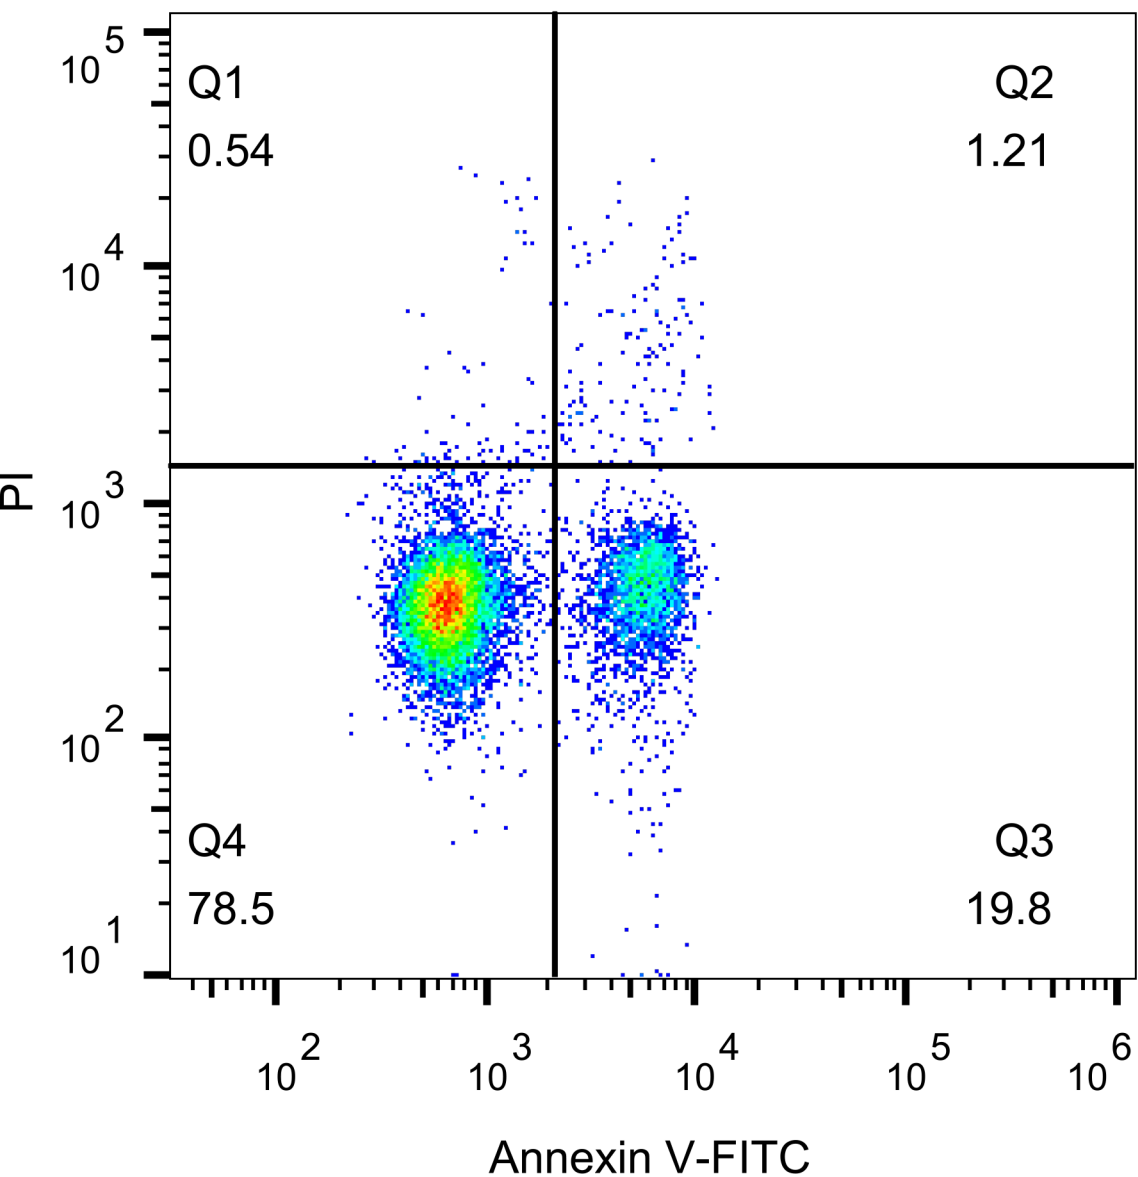

20-1.fcs

Single Cells

12330

Supplement: Supplementary file 4 [file 30660875]
